# Supplementary material
Source: publisher figshare collection journal article supplement (https://springernature.figshare.com/ndownloader/files/22064304)
Supplement: Supplementary file [file 22064304]

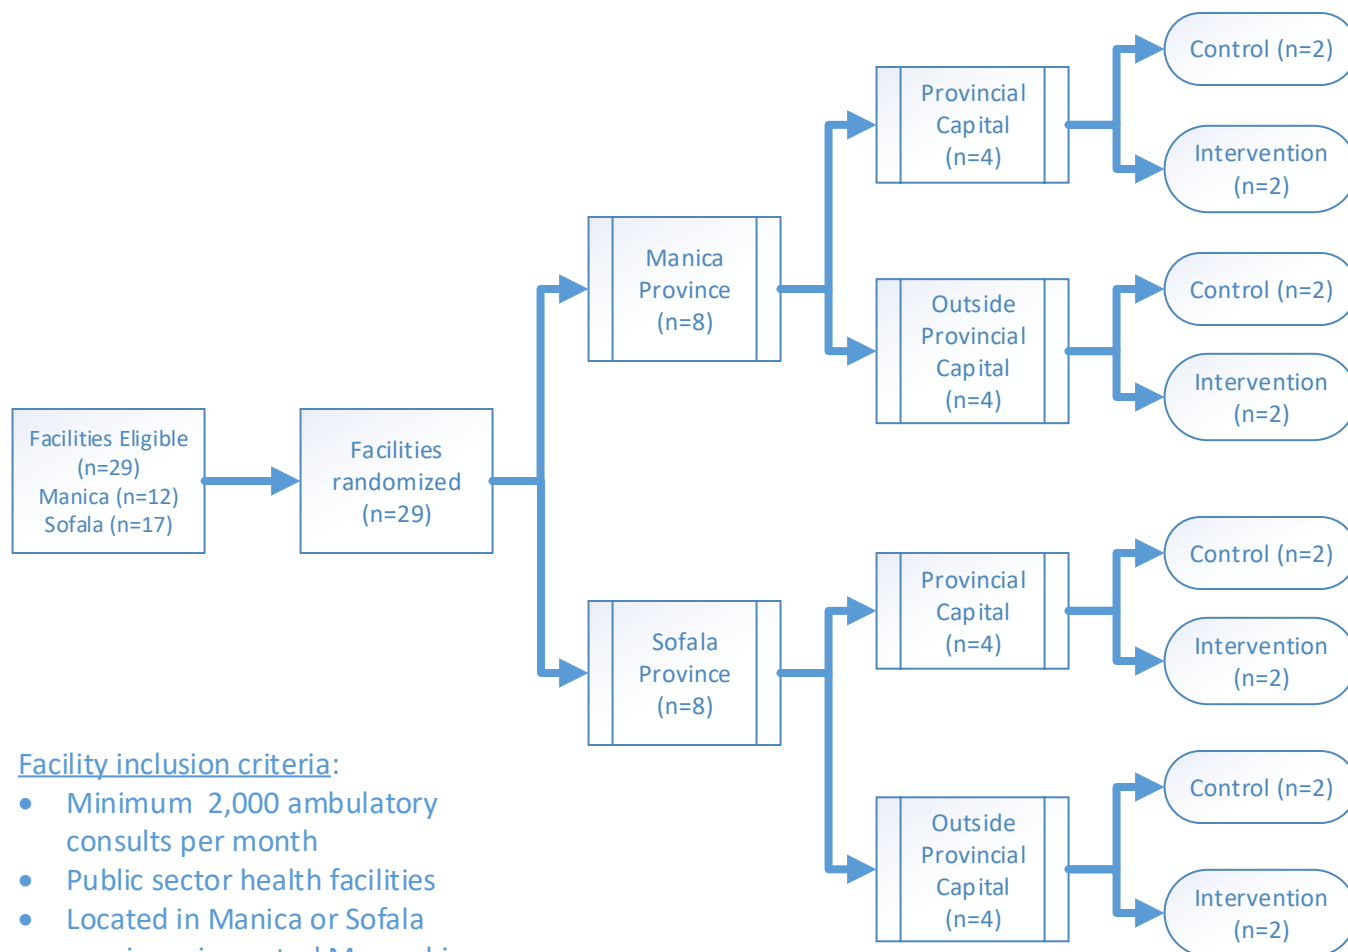

Facility inclusion criteria:

- Minimum 2,000 ambulatory consults per month
- Public sector health facilities
- Located in Manica or Sofala provinces in central Mozambique
- No ongoing ongoing prospective studies or similar systems analysis and enhancement techniques being implemented in ambulatory care
